# Supplementary material
Source: publisher site journal article supplement (https://www.dovepress.com/article/583727)
Supplement: Supplementary file 1 [file 583727%20Revised%20%2509Supplementary%20tables.docx]

**Table S1. Comparison of macular retinal thickness and superficial vessel density between the 7–11 y and 12–20 y groups at the same refraction level.**

| **Macular Retinal Thickness** | **Moderate myopia** | | | ***p*-value** | **Low myopia** | | | ***p*-value** | **Emmetropia** | | | ***p*-value** |
| --- | --- | --- | --- | --- | --- | --- | --- | --- | --- | --- | --- | --- |
|  | **7-11y** | **12-20y** | |  | **7-11y** | **12-20y** | |  | **7-11y** | **12-20y** | |  |
| Whole | 303±7 | | 301±15 | 0.586 | 303±10 | | 303±15 | 0.848 | 308±9 | | 308±14 | 0.813 |
| Fovea | 255±18 | | 249±25 | 0.373 | 246±16 | | 247±18 | 0.802 | 251±17 | | 242±15 | 0.089 |
| Parafovea | 314±9 | | 314±14 | 0.905 | 318±12 | | 318±16 | 0.940 | 322±10 | | 326±14 | 0.287 |
| Paratemporal | 307±11 | | 305±14 | 0.674 | 310±12 | | 310±15 | 0.895 | 313±10 | | 316±13 | 0.386 |
| Parasuperior | 318±9 | | 319±15 | 0.776 | 323±13 | | 322±14 | 0.798 | 327±10 | | 330±14 | 0.337 |
| Paranasal | 318±10 | | 318±15 | 0.915 | 322±13 | | 321±18 | 0.711 | 328±11 | | 330±16 | 0.516 |
| Parainferior | 314±10 | | 313±15 | 0.798 | 316±14 | | 317±17 | 0.795 | 320±11 | | 326±15 | 0.107 |
|  |  | |  |  |  | |  |  |  | |  |  |
| **Superficial Vessel Density** |  | |  |  |  | |  |  |  | |  |  |
| Whole | 41±4 | | 41±5 | 0.867 | 43±4 | | 42±4 | 0.658 | 43±3 | | 43±3 | 0.986 |
| Fovea | 22±8 | | 21±8 | 0.611 | 19±6 | | 19±6 | 0.984 | 21±5 | | 18±4 | 0.069 |
| Parafovea | 47±4 | | 47±5 | 0.982 | 49±4 | | 48±4 | 0.468 | 49±3 | | 49±3 | 0.452 |
| Paratemporal | 45±4 | | 45±5 | 0.909 | 48±4 | | 47±4 | 0.229 | 48±4 | | 48±4 | 0.990 |
| Parasuperior | 48±5 | | 47±5 | 0.762 | 49±5 | | 49±4 | 0.704 | 49±4 | | 50±4 | 0.680 |
| Paranasal | 46±5 | | 46±5 | 0.849 | 48±5 | | 47±5 | 0.548 | 48±4 | | 49±3 | 0.441 |
| Parainferior | 47±4 | | 47±6 | 0.745 | 49±4 | | 48±5 | 0.737 | 49±4 | | 51±3 | 0.076 |

y = year; M = moderate myopia; L = low myopia; E = emmetropia

**Table S2. Comparison of peripapillary RNFL thickness, peripapillary small vessel density, and C/D ratio between the 7–11 y and 12–20 y groups at the same refraction level.**

| **Macular Retinal Thickness** | **Moderate myopia** | | | ***p*-value** | **Low myopia** | | | ***p*-value** | **Emmetropia** | | | ***p*-value** |
| --- | --- | --- | --- | --- | --- | --- | --- | --- | --- | --- | --- | --- |
|  | **7-11y** | **12-20y** | |  | **7-11y** | **12-20y** | |  | **7-11y** | **12-20y** | |  |
| Whole | 114±16 | | 112±12 | 0.614 | 116±15 | | 116±8 | 0.828 | 117±9 | | 117±11 | 0.962 |
| Four quadrants |  | |  |  |  | |  |  |  | |  |  |
| - Temporal | 87±18 | | 81±8 | 0.136 | 75±10 | | 78±11 | 0.248 | 76±6 | | 80±12 | 0.341 |
| - Superior | 140±21 | | 139±16 | 0.857 | 144±24 | | 143±12 | 0.718 | 146±17 | | 144±15 | 0.645 |
| - Nasal | 94±32 | | 93±18 | 0.877 | 99±23 | | 100±14 | 0.871 | 99±14 | | 98±14 | 0.757 |
| - Inferior | 136±17 | | 137±20 | 0.893 | 144±18 | | 144±13 | 0.920 | 146±11 | | 146±12 | 0.997 |
|  |  | |  |  |  | |  |  |  | |  |  |
| **Superficial Vessel Density** |  | |  |  |  | |  |  |  | |  |  |
| Whole | 52±3 | | 52±3 | 0.597 | 53±2 | | 53±3 | 0.882 | 53±2 | | 52±1 | 0.356 |
| Four quadrants |  | |  |  |  | |  |  |  | |  |  |
| - Temporal | 56±4 | | 55±4 | 0.605 | 55±3 | | 56±4 | 0.846 | 55±3 | | 55±2 | 0.963 |
| - Superior | 52±4 | | 53±3 | 0.545 | 53±4 | | 53±3 | 0.795 | 53±3 | | 52±2 | 0.466 |
| - Nasal | 46±5 | | 47±4 | 0.310 | 48±3 | | 47±3 | 0.632 | 48±3 | | 48±2 | 0.915 |
| - Inferior | 52±4 | | 54±5 | 0.434 | 55±4 | | 54±3 | 0.227 | 54±3 | | 53±2 | 0.350 |
| Vertical C/D ratio | 0.55±0.16 | | 0.52±0.13 | 0.503 | 0.53±0.15 | | 0.54±0.12 | 0.755 | 0.46±0.11 | | 0.52±0.10 | 0.105 |

RNFL = retinal nerve fiber layer; C/D = cup-to-disc; y = year; M = moderate myopia; L = low myopia; E = emmetropia
